# Supplementary material
Source: PubMed Central journal article supplement (PMC7661067)
Supplement: 20-00658.pdf [file 20-00658.pdf]

**On-line Table: Summary of MR imaging features in patients with encephalopathy and COVID-19**

| Patient No. | Age (y)/ Sex | WM Involvement | Cortical Involvement | Basal Ganglia | Splenium | Microhemorrhage | Diffusion Restriction | Leptomeningitis | Suspected Etiology                                   |
|-------------|--------------|----------------|----------------------|---------------|----------|-----------------|-----------------------|-----------------|------------------------------------------------------|
| 1           | 59/F         | +              | +                    | +             | +        | +               | +                     | +               | Autoimmune, hypoxia                                  |
| 2           | 60/M         | +              |                      |               |          |                 | +                     |                 | Hypoxia, leukoencephalitis                           |
| 3           | 35/F         | +              |                      |               | +        | +               | +                     |                 | Hemorrhagic leukoencephalopathy, hypoxia             |
| 4           | 48/M         | +              |                      |               |          |                 | +                     |                 | Postviral autoimmune demyelinating encephalomyelitis |
| 5           | 41/M         | +              |                      | +             |          |                 | +                     |                 | Hypoxia, encephalitis                                |

**Note:**—+ indicates present on MR.
